# Supplementary material for: Rapid, energy-efficient synthesis of the layered carbide, Al4C3
Source: Royal Society of Chemistry journal article supplement (doi:10.1039/c4gc01277a), 2014-08-26
Supplement: c4gc01277a1.pdf [file c4gc01277a1.pdf]

## Rapid Microwave Synthesis and Characterisation of the Layered Carbide, $\text{Al}_4\text{C}_3$ .

Jennifer L. Kennedy,<sup>a,b</sup> Timothy D. Drysdale<sup>\*a</sup> and Duncan H. Gregory<sup>\*b</sup>

<sup>a</sup> School of Engineering, Rankine Building, University of Glasgow, Glasgow G12 8QQ; E-mail: Timothy.Drysdale@Glasgow.ac.uk.

<sup>b</sup> WestCHEM, School of Chemistry, Joseph Black Building, University of Glasgow, Glasgow G12 8QQ; E-mail: Duncan.Gregory@Glasgow.ac.uk.

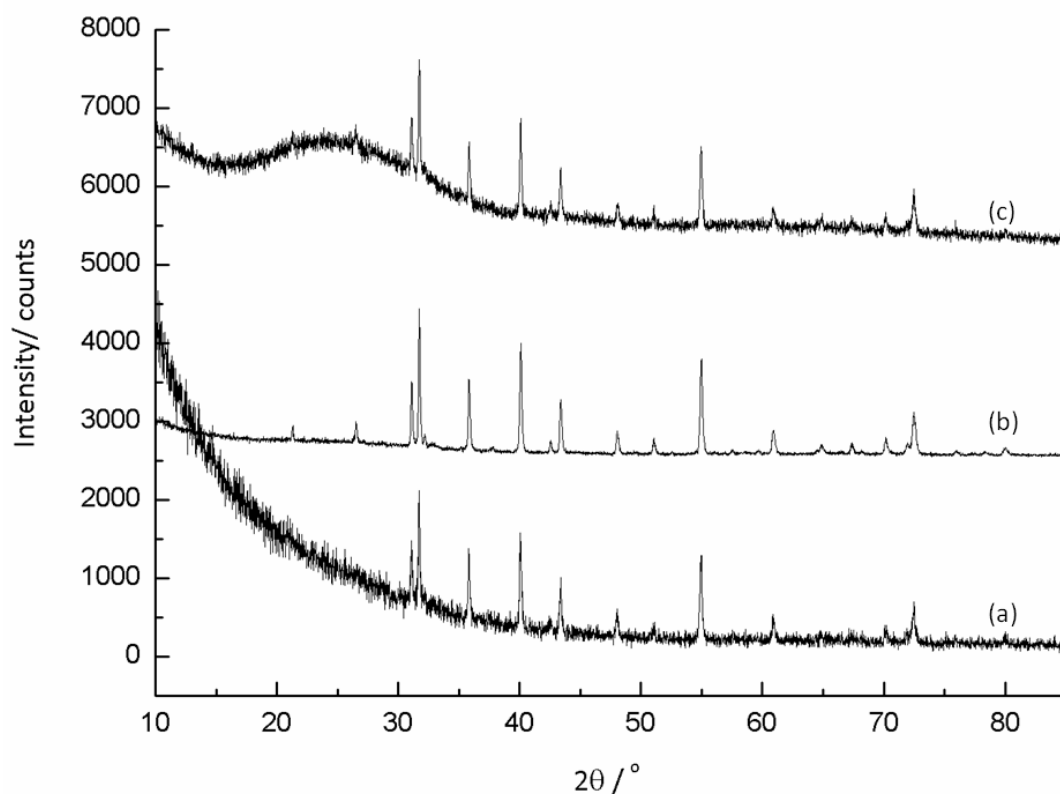

Fig. S1 PXD patterns of post-TGA  $\text{Al}_4\text{C}_3$  with thermal analysis carried out under : (a) air, (b) argon and (c) nitrogen. Note the graphite reflection at  $2\theta \sim 27^\circ$  is no longer present in the pattern from the air-heated product (a).

Table S1: Atomic parameters from Rietveld refinement.

| Atom Type | Atom Site Label | X | Y | Z           | Site occupancy | Thermal Displacement Type | Uiso      | Multiplicity |
|-----------|-----------------|---|---|-------------|----------------|---------------------------|-----------|--------------|
| Al        | Al1             | 0 | 0 | 0.29407(5)  | 1.0            | Uiso                      | 0.0171(5) | 6            |
| Al        | Al2             | 0 | 0 | 0.12953(4)  | 1.0            | Uiso                      | 0.0150(5) | 6            |
| C         | C1              | 0 | 0 | 0           | 1.0            | Uiso                      | 0.0081(7) | 3            |
| C         | C2              | 0 | 0 | 0.21700(13) | 1.0            | Uiso                      | 0.0081(7) | 6            |

Table S2: Selected atomic distances (Å) and angles (°) from Rietveld Refinement

| Atomic Distances (Å) and Angles (°) in Microwave Synthesised Al <sub>4</sub> C <sub>3</sub> |            |                   |             |
|---------------------------------------------------------------------------------------------|------------|-------------------|-------------|
| Al(1)- Al(1)                                                                                | 2.7511(17) | Al(1)-Al(1)-C(2)  | 135.530(34) |
| Al(1)-Al(2)                                                                                 | 2.9679(13) | C(1)-Al(1)-C(1)   | 101.013(34) |
| Al(1)-C(1)                                                                                  | 2.1629(5)  | C(1)-Al(1)-C(2)   | 116.991(28) |
| Al(1)-C(2)                                                                                  | 1.9268(34) | Al(2)-Al(2)-Al(2) | 77.17(5)    |
| Al(2)- Al(1)                                                                                | 2.9679(13) | Al(2)-Al(2)-C(2)  | 46.067(35)  |
| Al(2)- Al(2)                                                                                | 2.6762(16) | Al(2)-Al(2)-C(2)  | 53.65(10)   |
| Al(2)- C(2)                                                                                 | 2.1870(34) | Al(2)-Al(2)-C(2)  | 118.17(8)   |
| Al(2)- C(2)                                                                                 | 1.9554(6)  | C(2)-Al(2)-C(2)   | 99.72(11)   |
| C(1)- Al(1)                                                                                 | 2.1629(5)  | C(2)-Al(2)-C(2)   | 117.21(6)   |
| C(2)- Al(1)                                                                                 | 1.9268(34) | Al(1)-C(1)-Al(1)  | 101.013(34) |
| C(2)- Al(2)                                                                                 | 2.1870(34) | Al(1)-C(1)-Al(1)  | 78.987(34)  |
| C(2)- Al(2)                                                                                 | 1.9554(6)  | Al(1)-C(1)-Al(1)  | 180.0       |
|                                                                                             |            | Al(1)-C(2)-Al(2)  | 180.0       |
| Al(1)-Al(1)-Al(1)                                                                           | 74.70(5)   | Al(1)-C(2)-Al(2)  | 99.72(11)   |
| Al(1)-Al(1)-C(1)                                                                            | 50.506(17) | Al(2)-C(2)-Al(2)  | 80.28(11)   |
| Al(1)-Al(1)-C(1)                                                                            | 107.48(6)  | Al(2)-C(2)-Al(2)  | 117.21(6)   |

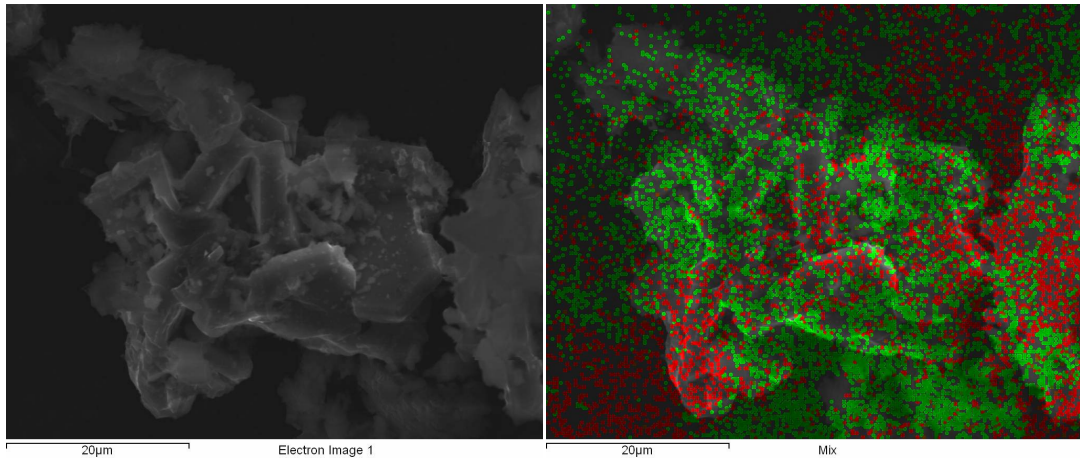

Fig. S2a SEM micrograph and element map; green = Al, red = C, for MW synthesised  $\text{Al}_4\text{C}_3$

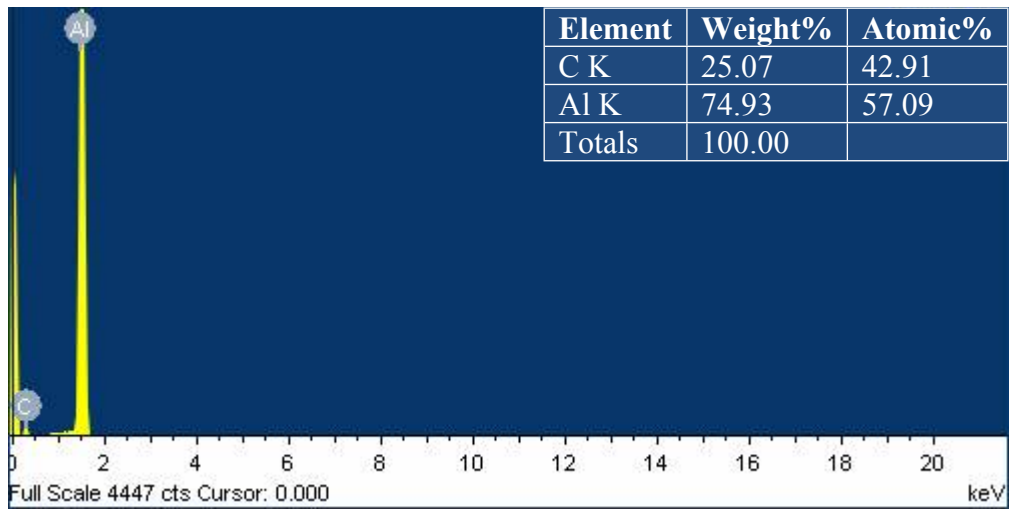

Fig. S2b EDX Spectrum for the MW synthesised  $\text{Al}_4\text{C}_3$  sample above

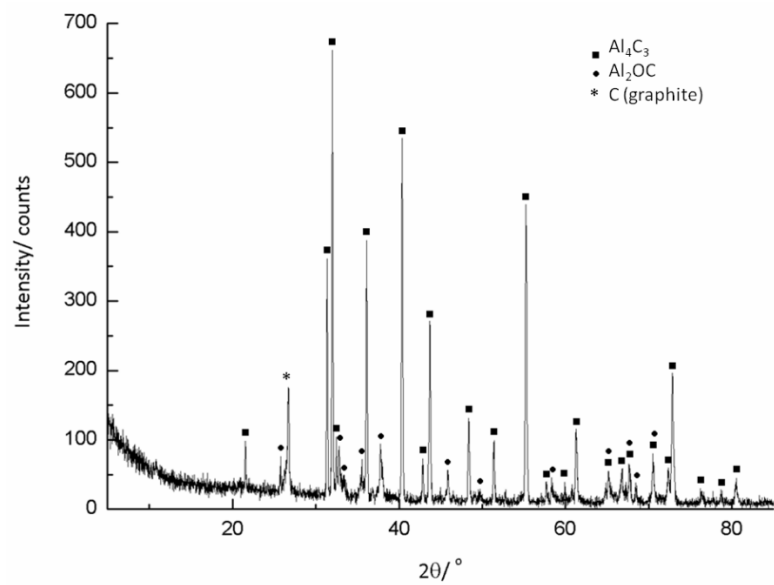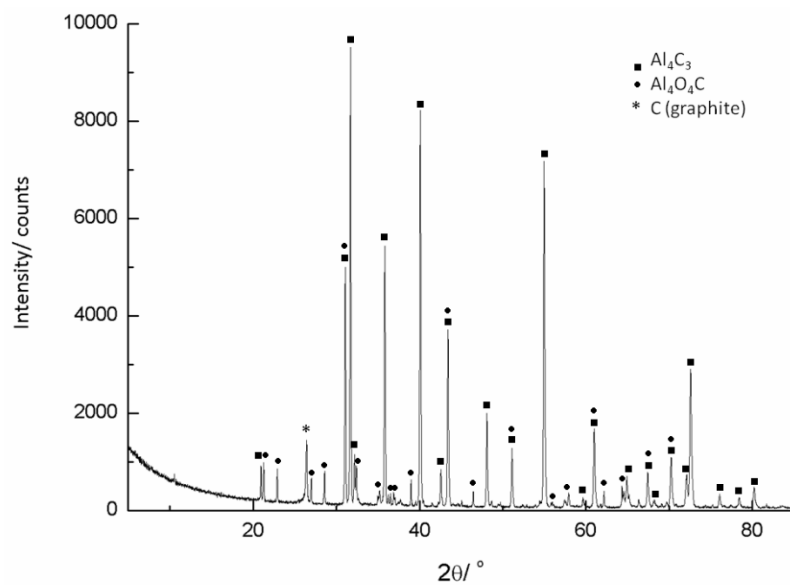

Fig. S3 *Ex-situ* PXD patterns from typical 4 Al + 3 C reactions performed in air for 30 min using graphite powder as a susceptor in the MMC reactor.
